# Supplementary material for: A Case of Mucopolysaccharidosis II Caused by a Novel Variant with Skin Linear Hyperpigmented Streaks along Blaschko’s Lines
Source: MDPI journal article supplement (doi:10.3390/ijms24065647), 2023-03-15
Supplement: s1 [file s1]

# **A Case of Mucopolysaccharidosis II Caused by a Novel Variant with Skin Linear Hyperpigmented Streaks along Blaschko's Lines**

**Viktoriia Sofronova <sup>1,2,†</sup>, Elizaveta Gurinova <sup>3,†</sup>, Diana Petukhova <sup>2</sup>, Hiroko Fukamatsu <sup>4</sup>, Takenobu Yamamoto <sup>4</sup>, Yumi Aoyama <sup>4</sup>, Polina Golikova <sup>2,3</sup>, Gavril Moskvitin <sup>2,3</sup>, Roza Ivanova <sup>2,3</sup>, Mira Savvina <sup>2</sup>, Filipp Vasilev <sup>2</sup>, Takahito Moriwaki <sup>1</sup>, Seigo Terawaki <sup>1</sup>, Aitalina Sukhomyasova <sup>2,3</sup>, Nadezhda Maksimova <sup>2</sup>, and Takanobu Otomo <sup>1,\*</sup>**

<sup>1</sup> Department of Molecular and Genetic Medicine, Kawasaki Medical School, Kurashiki 701-0192, Japan;

<sup>2</sup> Laboratory of Molecular Medicine and Human Genetics, North-Eastern Federal University, 677013 Yakutsk, Russia

<sup>3</sup> Medical Genetics Center, Republic Hospital No. 1 – National Center of Medicine, 677019 Yakutsk, Russia

<sup>4</sup> Department of Dermatology, Kawasaki Medical School, Kurashiki 701-0192, Japan

\* Correspondence: otomo@med.kawasaki-m.ac.jp; Tel.: +81-86-462-1111

† These authors contributed equally to this work

**Figure S1.** PCR analysis to detect presence of wild-type and deletion of exons 4-10.

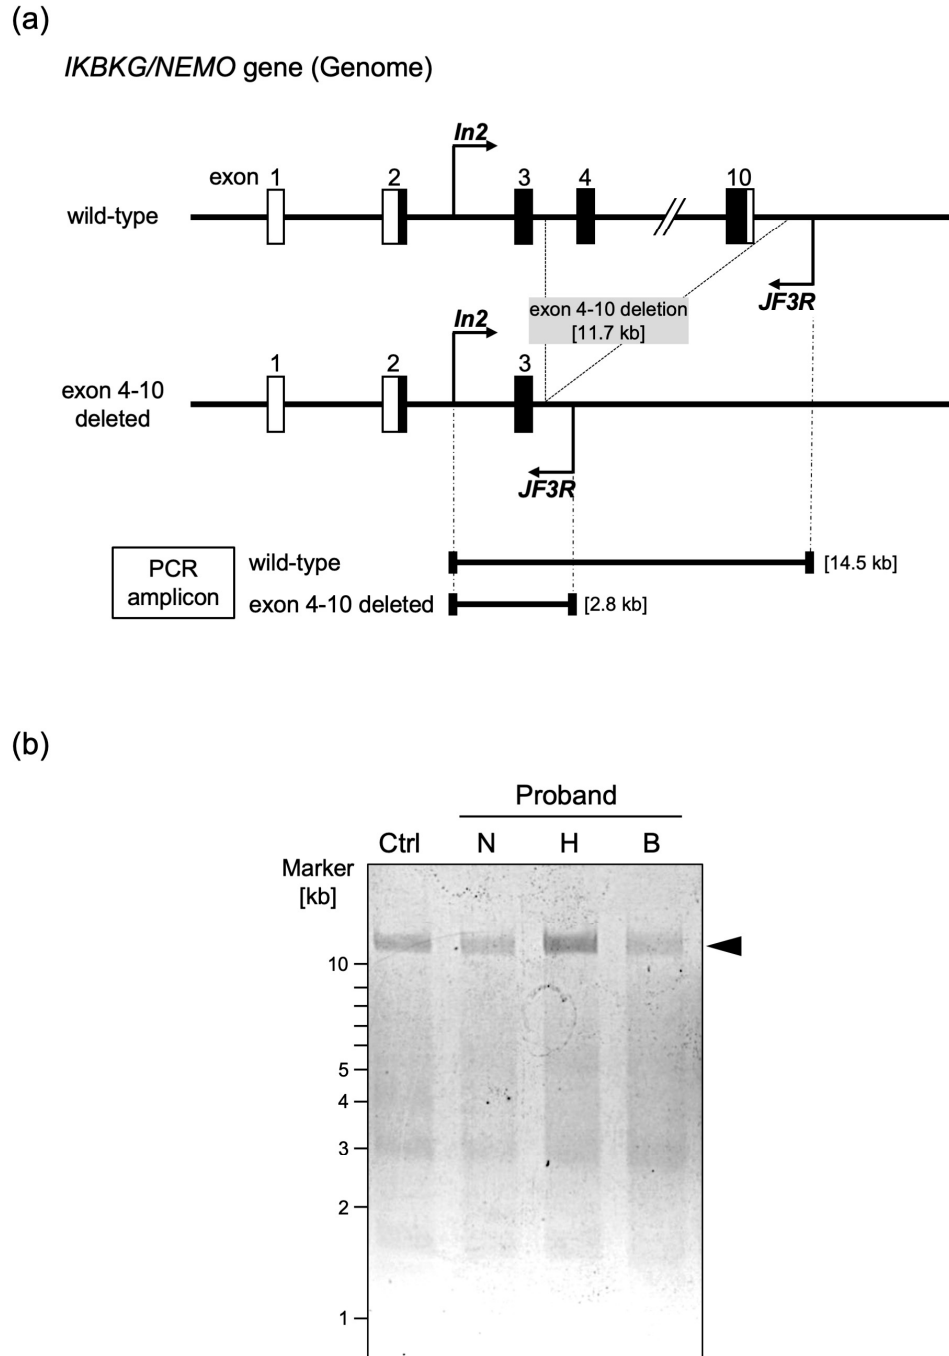

**Figure S1** Schematic representation of *IKBKG/NEMO* gene and PCR results using primer set to detect exons 4-10 deletion.

(a) Structure of *IKBKG/NEMO* gene and the position of *IKBKG/NEMO* gene-specific primer set which was previously reported for the detection of exon 4-10 deletion [15]: forward primer *In2* and reverse primer *JF3R*. Expected PCR products with sizes 14.5 kb and 2.8 kb are derived from intact allele and exons 4-10 deleted allele, respectively. Coding exons are shown as black boxes. (b) Agarose gel electrophoresis of PCR products. PCR was performed using primers (*In2*/*JF3R*) with genomic DNA. Exon 4-10 deletion was not observed with this method. Ctrl: normal skin fibroblast, N: proband's skin fibroblast established from a non-pigmented skin part, H: proband's skin fibroblast established from a hyperpigmented skin lesion, B: proband's peripheral blood. Arrowhead indicates a 14.5 kb PCR amplicon corresponding to the intact allele. Marker; 1 kb ladder.
